# Supplementary material
Source: publisher figshare collection journal article supplement (https://acs.figshare.com/ndownloader/files/8372954)
Supplement: Supplementary file 1 [file 8372954]

# Continuous Flow Synthesis of Rh and RhAg Alloy Nanoparticle Catalysts Enables Scalable Production and Improved Morphological Control

*Pranaw Kunal,<sup>a†</sup> Emily J. Roberts,<sup>b†</sup> Carson T. Riche,<sup>c</sup> Karalee Jarvis,<sup>d</sup> Noah Malmstadt,<sup>\*b,c</sup>*

*Richard L. Brutchey,<sup>\*b</sup> and Simon M. Humphrey<sup>\*a</sup>*

<sup>†</sup> Both authors contributed equally

<sup>a</sup>. Department of Chemistry, The University of Texas at Austin, 6.336 Norman Hackerman Building, 100 E 24th St. Stop A1590, Austin, Texas, 78712-1224, USA.

<sup>b</sup>. Department of Chemistry, University of Southern California, Los Angeles, California, 90089, USA.

<sup>c</sup>. Mork Family Department of Chemical Engineering and Materials Science, University of Southern California, Los Angeles, California, 90089, USA.

<sup>d</sup>. Texas Materials Institute, The University of Texas at Austin, 204 E. Dean Keeton St. Stop C2201, Austin, Texas, 78712-1591, USA.

**Table S1.** Reaction parameters for flow reactions carried out under  $\mu$ wI.

| Flow Mode    | Flow Rate ( $\text{cm}^3\text{h}^{-1}$ ) |             |                                                     | Length of Tubing (m) | Residence Time (min) |
|--------------|------------------------------------------|-------------|-----------------------------------------------------|----------------------|----------------------|
| Single-phase | 30                                       |             |                                                     | 7.6                  | 9                    |
| Single-phase | 30                                       |             |                                                     | 3.8                  | 4.6                  |
| Single-phase | 15                                       |             |                                                     | 7.6                  | 18                   |
| Single-phase | 7.5                                      |             |                                                     | 7.6                  | 35                   |
| Two-phase    | 160<br>(Carrier Fluid)                   | 64<br>(PVP) | 16<br>( $\text{RhCl}_3 \cdot x\text{H}_2\text{O}$ ) | 7.6                  | 1                    |
| Two-phase    | 80<br>(Carrier Fluid)                    | 32<br>(PVP) | 8<br>( $\text{RhCl}_3 \cdot x\text{H}_2\text{O}$ )  | 7.6                  | 2                    |
| Two-phase    | 80<br>(Carrier Fluid)                    | 32<br>(PVP) | 8<br>( $\text{RhCl}_3 \cdot x\text{H}_2\text{O}$ )  | 30.5                 | 6                    |
| Two-phase    | 80<br>(Carrier Fluid)                    | 32<br>(PVP) | 8<br>( $\text{RhCl}_3 \cdot x\text{H}_2\text{O}$ )  | 30.5                 | 9                    |
| Two-phase    | 20<br>(Carrier Fluid)                    | 8<br>(PVP)  | 2<br>( $\text{RhCl}_3 \cdot x\text{H}_2\text{O}$ )  | 30.5                 | 30                   |

**Table S2.** Ratio of intensity values corresponding to 111 and 200 obtained from PXRD analyses.

| Sample                                                                                                      | $I_{111}/I_{200}$ |
|-------------------------------------------------------------------------------------------------------------|-------------------|
| Rh multipods_ $\mu$ wI_120°C_9 min                                                                          | 1.94              |
| Rh multipods_CvH_120°C_9 min                                                                                | 1.48              |
| Batch reaction_no syringe pump_Rh NPs_ $\mu$ wI_120°C_9 min                                                 | 1.77              |
| Rh NPs_ $\mu$ wI_120°C_9 min_ $\text{RhCl}_3 \cdot x\text{H}_2\text{O}$ and PVP injected using syringe pump | 1.76              |

**Table S3.** Statistical analysis of Rh multipods formed after different thermal treatment conditions.

| Sample Identity          | Original Average Appendage Length/Diameter (nm) |                 | Thermal Treatment Conditions |                           | Reaction Time (min) | Size of Multipods (nm) | Size of Non-multipods (nm) | Size of Small Seeds (nm) |
|--------------------------|-------------------------------------------------|-----------------|------------------------------|---------------------------|---------------------|------------------------|----------------------------|--------------------------|
|                          | Multipods                                       | Non-multipods   | Mode of Heating              | Reaction Temperature (°C) |                     |                        |                            |                          |
| Rh multipods- $\mu$ wI   | 6.75 $\pm$ 1.40                                 | 3.67 $\pm$ 0.64 | $\mu$ wI                     | 150                       | 15                  | 6.64 $\pm$ 1.54        |                            |                          |
| RhMP multipods- $\mu$ wI |                                                 |                 | $\mu$ wI                     | 175                       | 15                  | 6.13 $\pm$ 1.14        |                            |                          |
| Rh multipods- $\mu$ wI   |                                                 |                 | $\mu$ wI                     | 175                       | 60                  | 6.94 $\pm$ 1.49        |                            |                          |
| Rh multipods-CvH         | 6.81 $\pm$ 1.68                                 | 3.93 $\pm$ 0.98 | $\mu$ wI                     | 150                       | 15                  | 7.25 $\pm$ 1.39        | 5.05 $\pm$ 0.81            |                          |
| Rh multipods-CvH         |                                                 |                 | $\mu$ wI                     | 175                       | 15                  | 7.27 $\pm$ 1.51        | 5.07 $\pm$ 0.79            | 2.19 $\pm$ 0.30          |
| Rh multipods-CvH         |                                                 |                 | CvH                          | 175                       | 15                  | 6.31 $\pm$ 1.48        | 4.33 $\pm$ 0.65            |                          |
| Rh multipods-CvH         |                                                 |                 | CvH                          | 175                       | 60                  | 6.96 $\pm$ 1.24        | 4.55 $\pm$ 0.71            |                          |

**Table S3.** ICP analysis of Rhodium multipods supported on amorphous silica.

| Sample                             | Rh wt% | SSTOF (surface site <sup>-1</sup> s <sup>-1</sup> ) Value |
|------------------------------------|--------|-----------------------------------------------------------|
| Rh multipods_ $\mu$ wI_120°C_9 min | 1.362  | 8.5                                                       |
| Rh multipods_CvH_120°C_9 min       | 3.345  | 6.8                                                       |

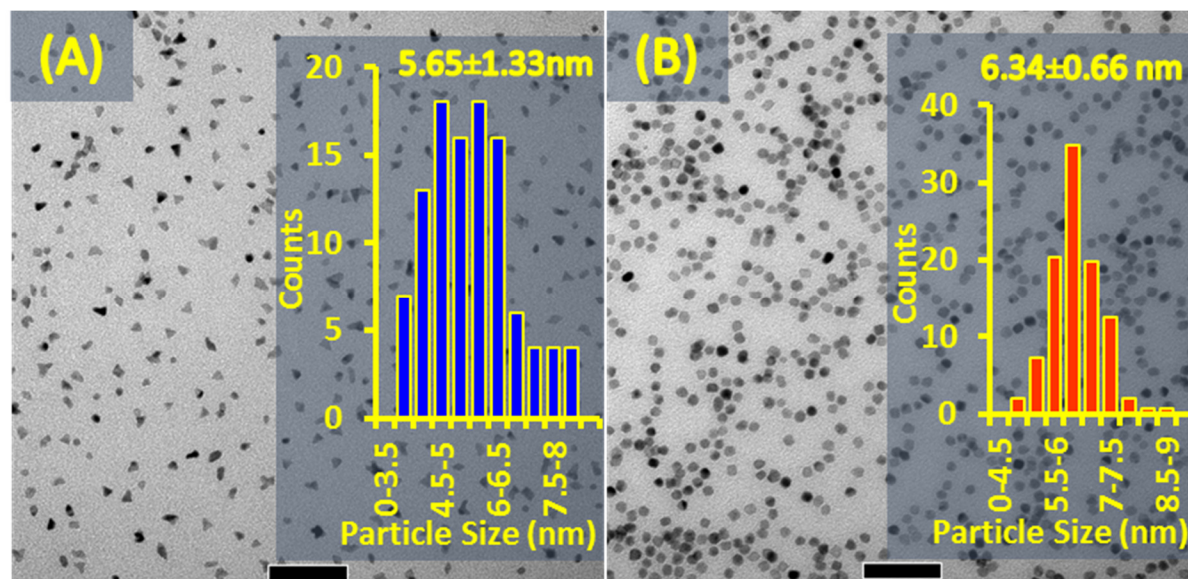

**Figure S1.** TEM images of Rh NPs using control reactions. **(A)** Products isolated from control batch reaction carried out under  $\mu$ wI at 120 °C for 9 minutes while not using a syringe pump. **(B)** Products isolated from control reaction carried out under  $\mu$ wI at 120 °C for 9 minutes and adding  $\text{RhCl}_3 \cdot x\text{H}_2\text{O}$  and PVP dissolved in EG injected using separate syringes.



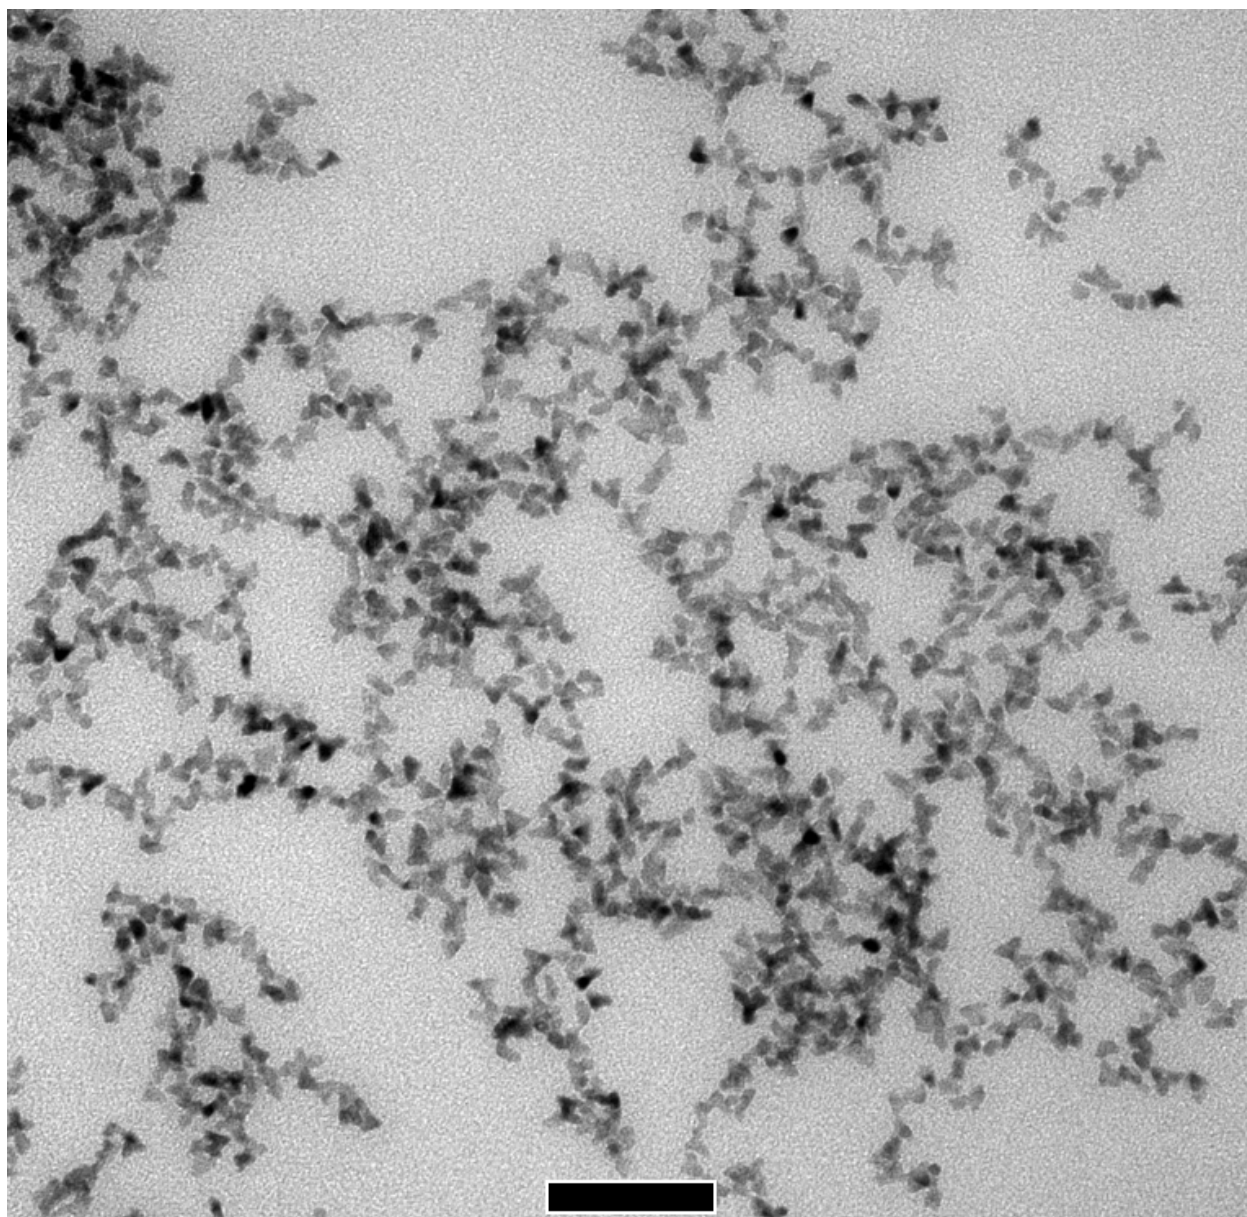

**Figure S2.** Microwave assisted thermal treatment at 150 °C for 15 min of Rh multipods synthesized using  $\mu$ wI at 120°C in EG in 9 min. Scale bar is 50 nm.

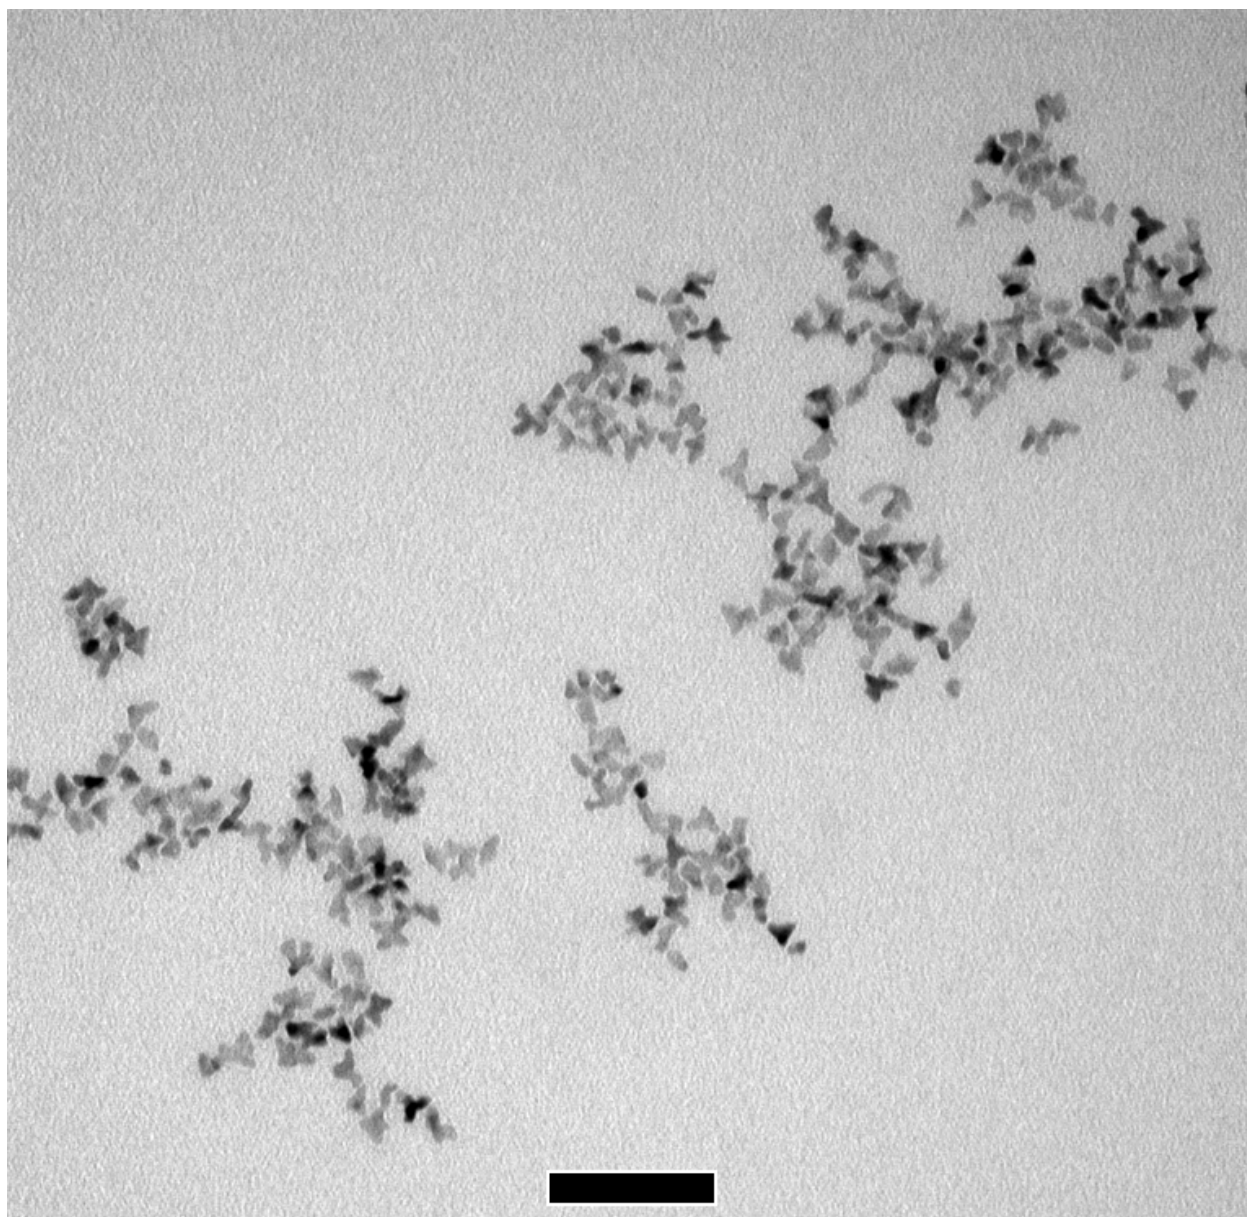

**Figure S3.** Microwave assisted thermal treatment at 175 °C for 15 min of Rh multipods synthesized using  $\mu$ wI at 120°C in EG in 9 min. Scale bar is 50 nm.

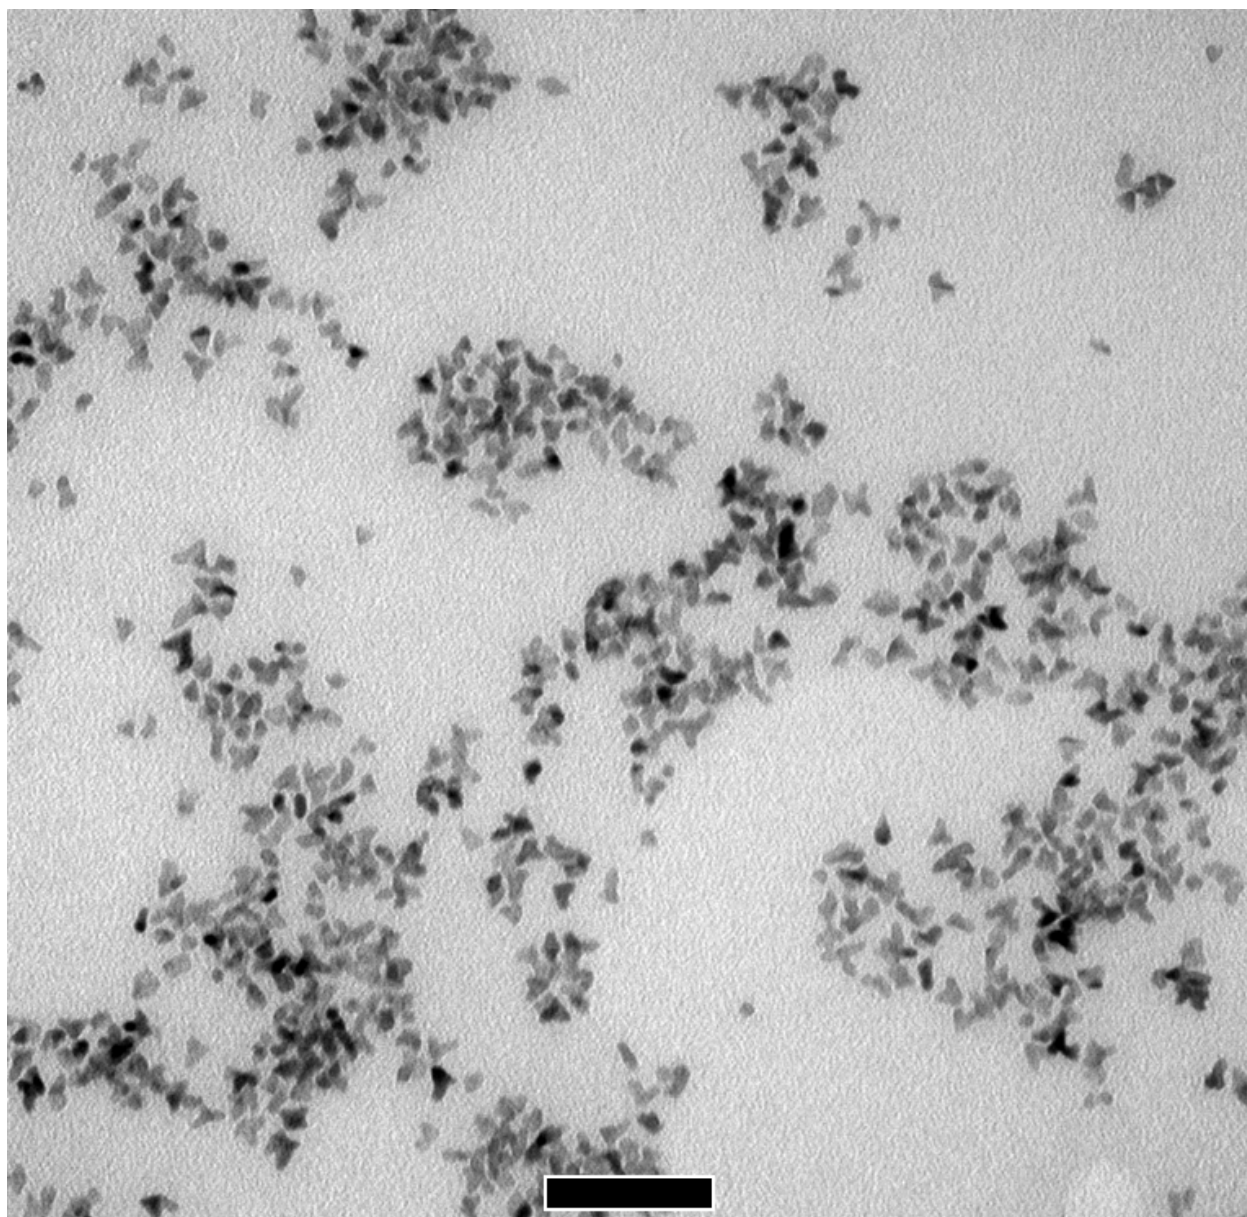

**Figure S4.** Microwave assisted thermal treatment at 175 °C for 60 min of Rh multipods synthesized using  $\mu$ wI at 120°C in EG in 9 min. Scale bar is 50 nm.

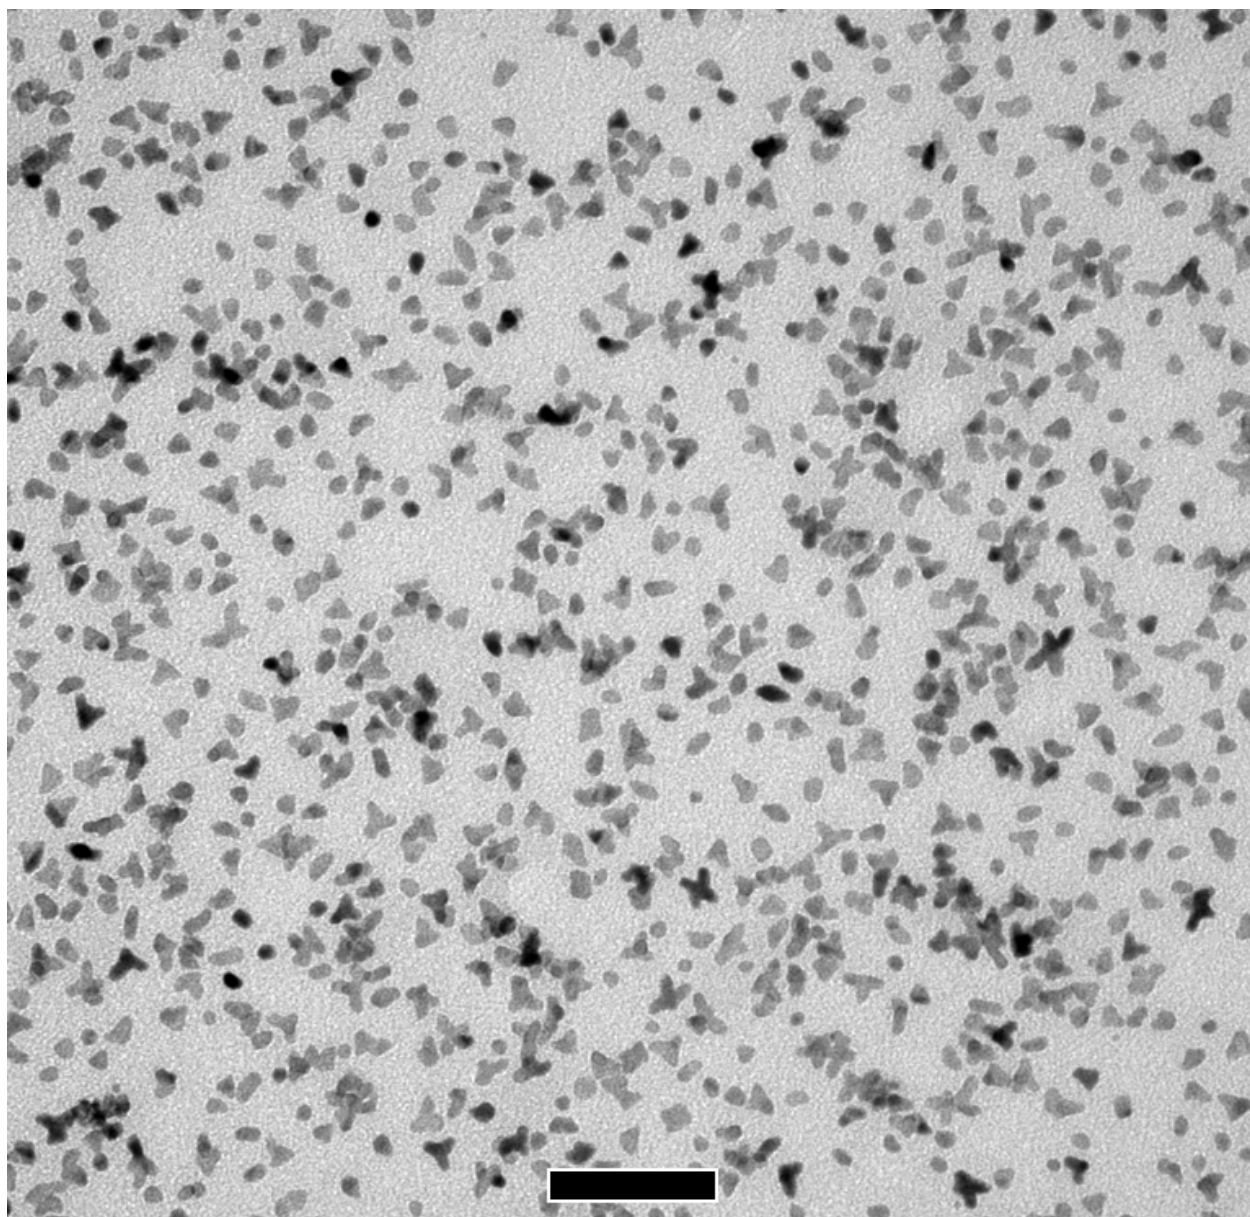

**Figure S5.** Oil bath assisted thermal treatment at 150 °C for 15 min of Rh multipods synthesized using CvH at 120°C in EG in 9 min. Scale bar is 50 nm.



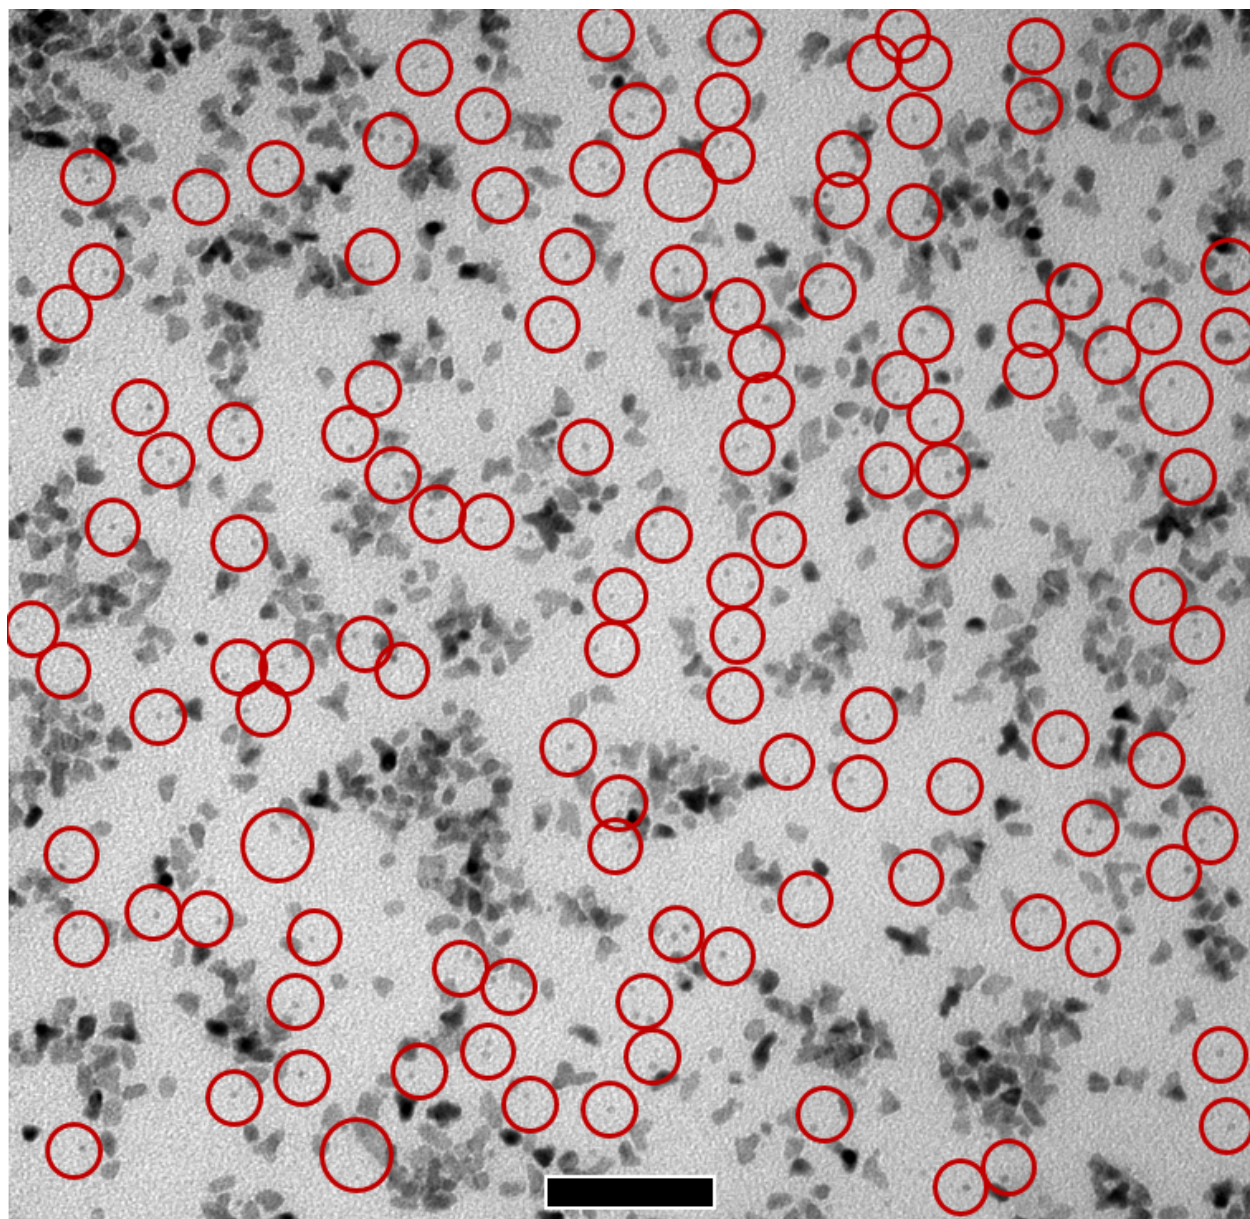

**Figure S6.** Microwave assisted thermal treatment at 175 °C for 15 min of Rh multipods synthesized using CvH at 120°C in EG in 9 min. Red circles indicate small Rh seeds. Scale bar is 50 nm.

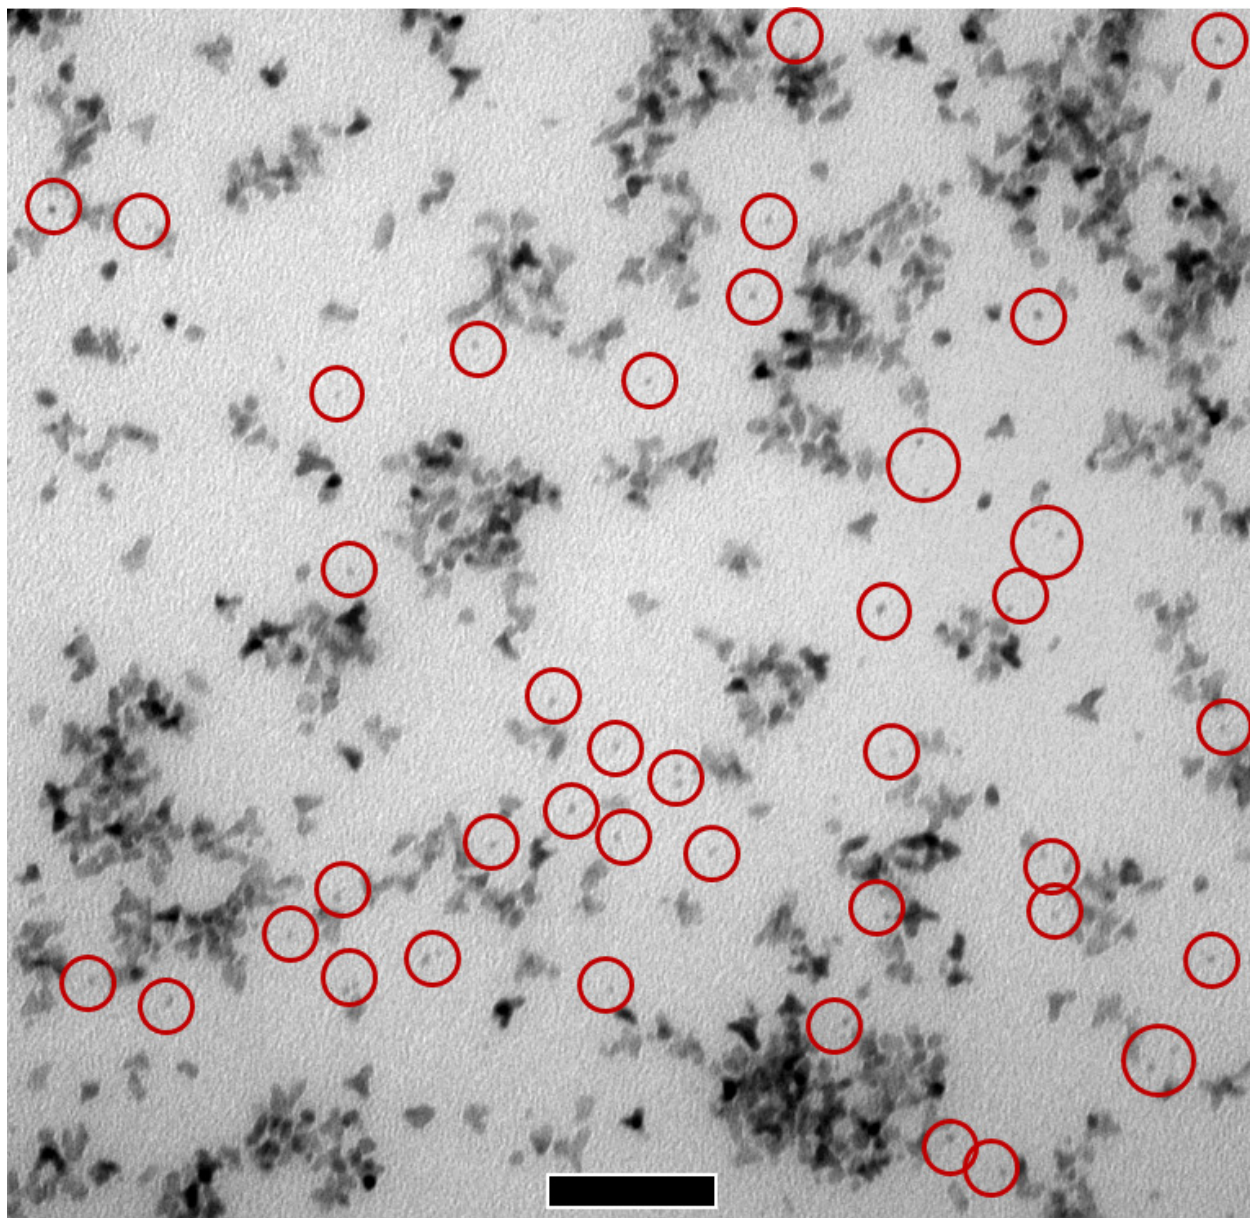

**Figure S7.** Oil bath assisted thermal treatment at 175 °C for 15 min of Rh multipods synthesized using CvH at 120°C in EG in 9 min. Red circles indicate small Rh seeds. Scale bar is 50 nm.



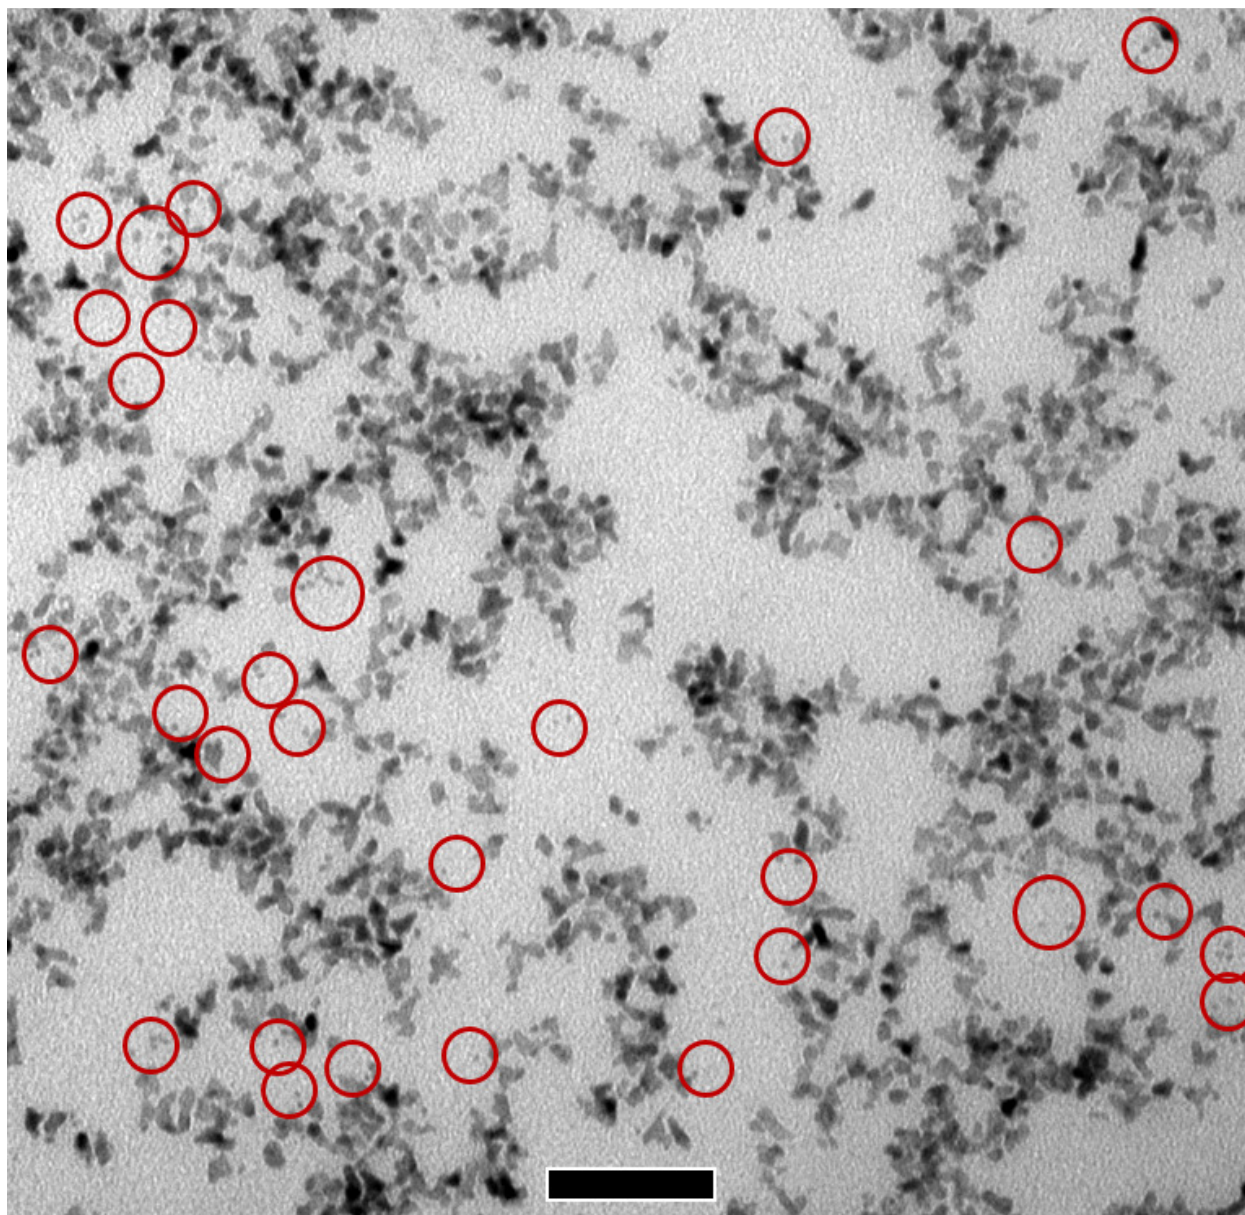

**Figure S8.** Oil bath assisted thermal treatment at 175 °C for 60 min of Rh multipods synthesized using CvH at 120°C in EG in 9 min. Red circles indicate small Rh seeds. Scale bar is 50 nm.

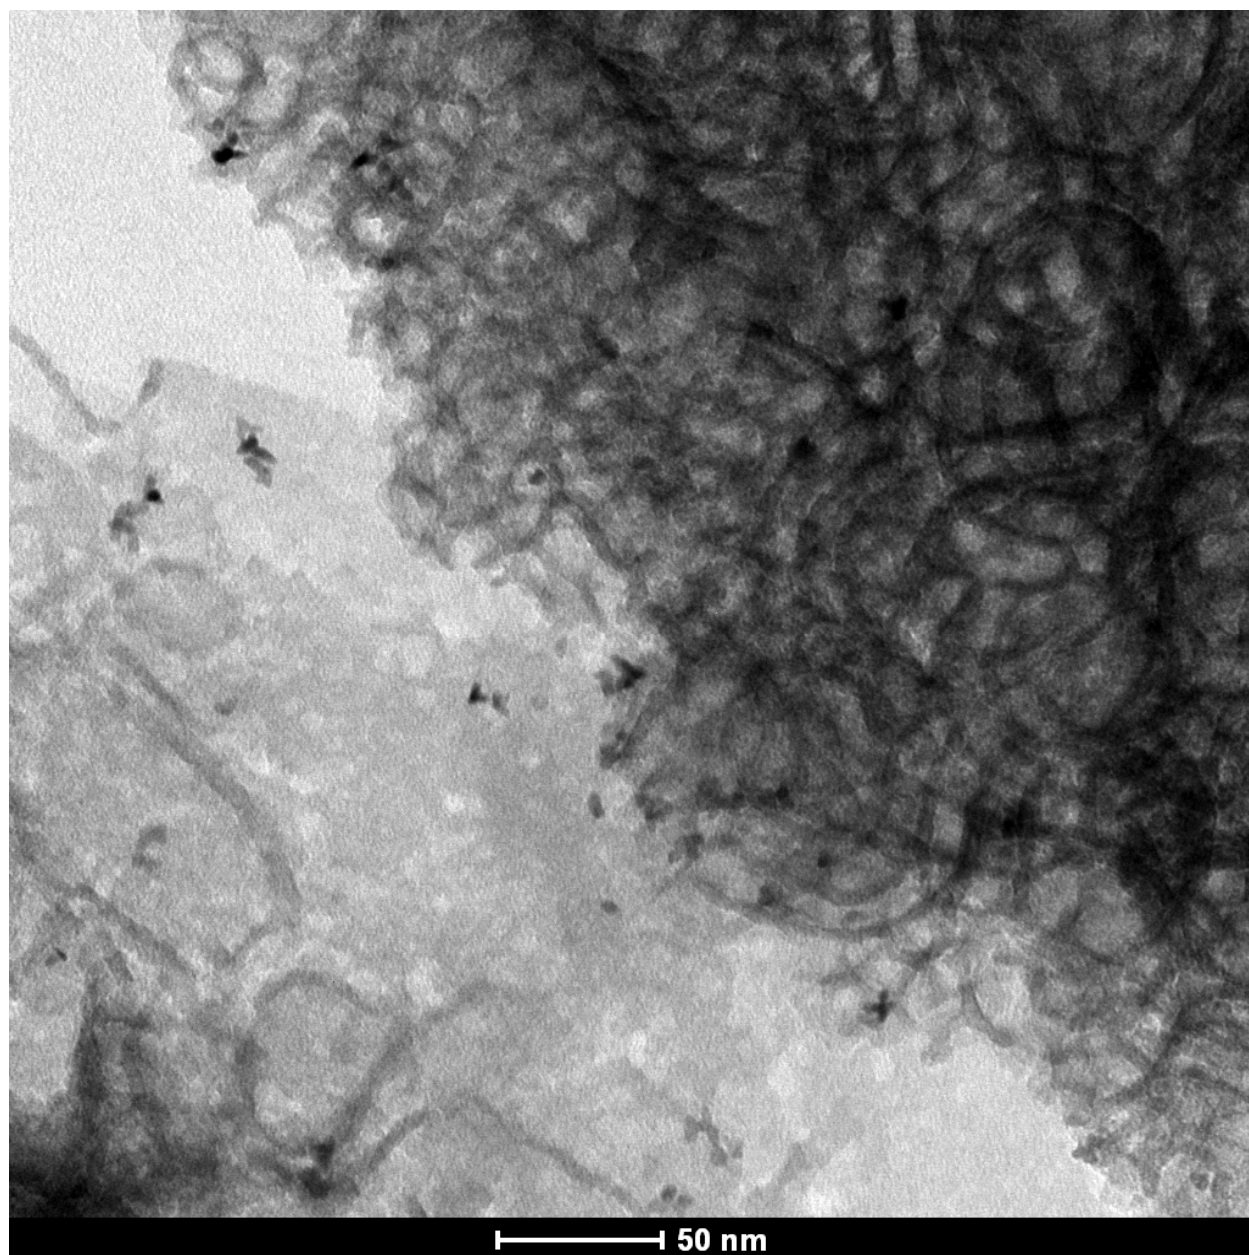

**Figure S9.** TEM image of Rh multipods synthesized under  $\mu$ wI using two phase flow reaction at 120 °C for 9 minutes after being supported on amorphous silica; scale bar is 50 nm.



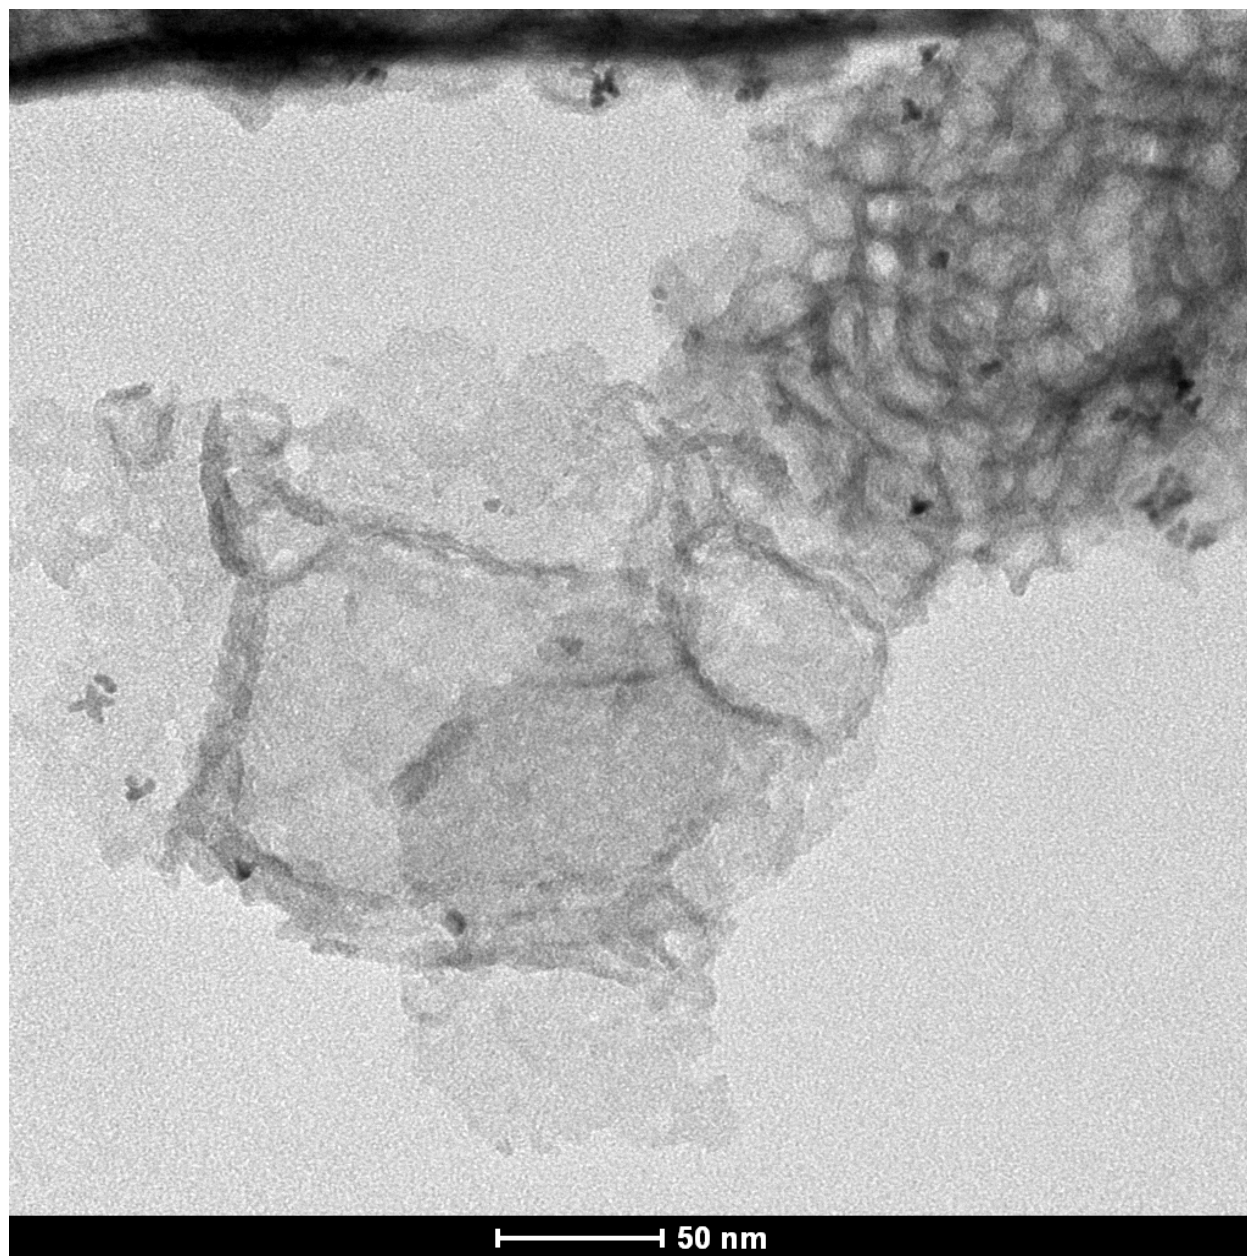

**Figure S10.** (A) TEM image of post-catalytic Rh multipods synthesized under  $\mu$ wI using two phase flow reaction at 120 °C for 9 minutes after being supported on amorphous silica; scale bar is 50 nm.

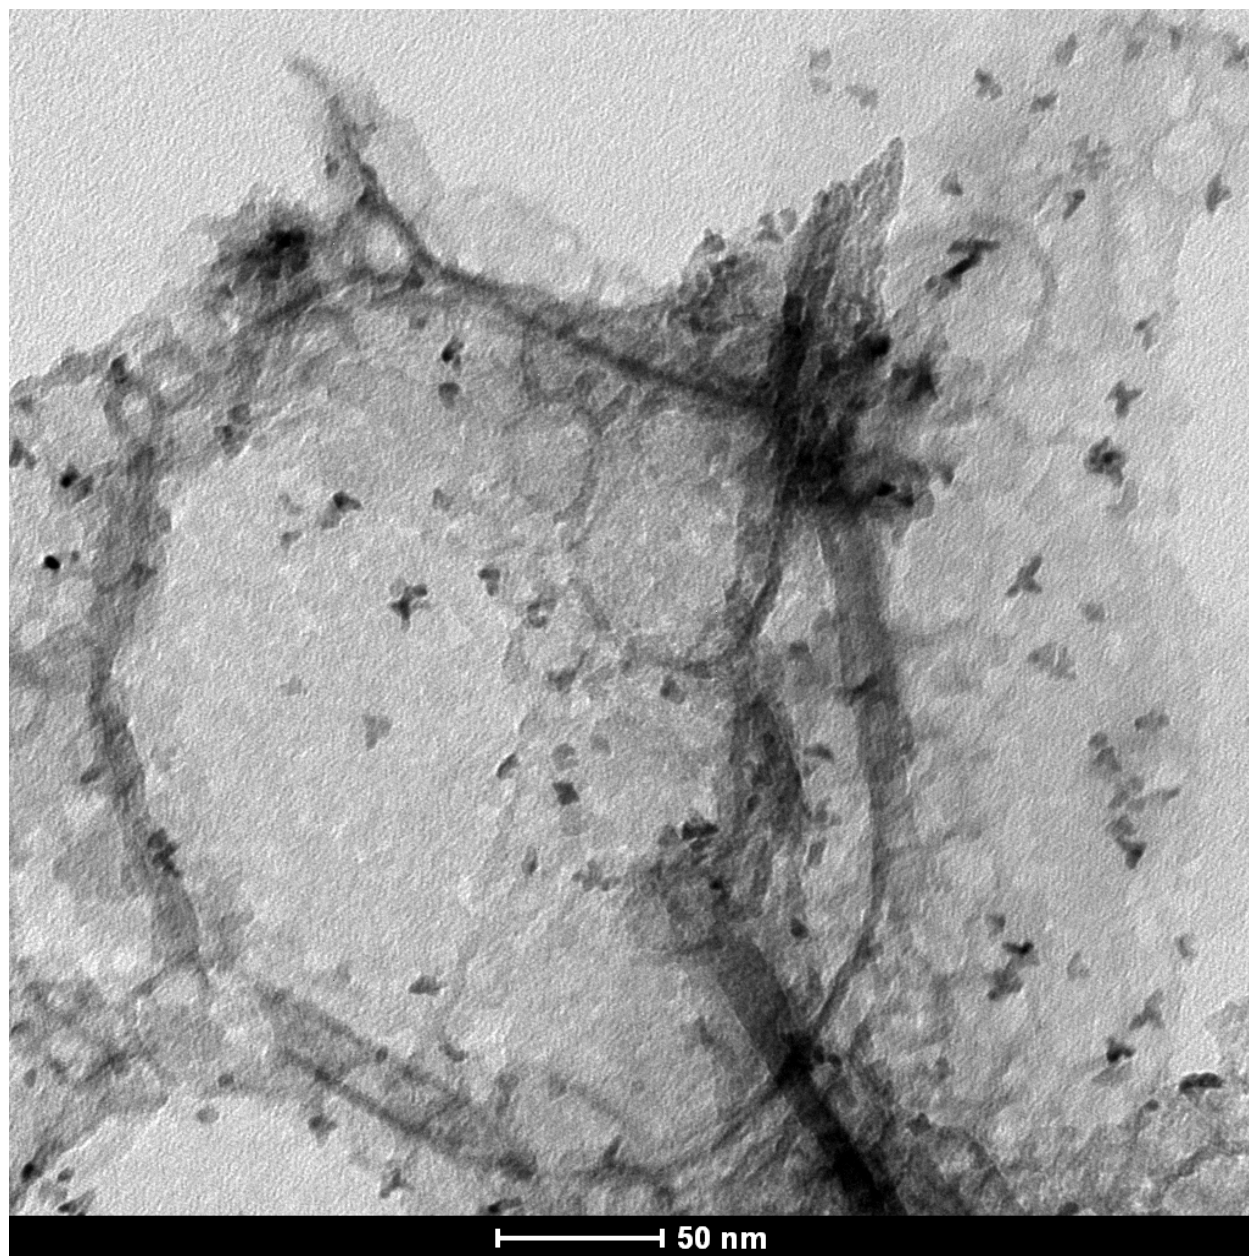

**Figure S11.** TEM image of Rh multipods synthesized under CvH using two phase flow reaction at 120 °C for 9 minutes after being supported on amorphous silica; scale bar is 50 nm.

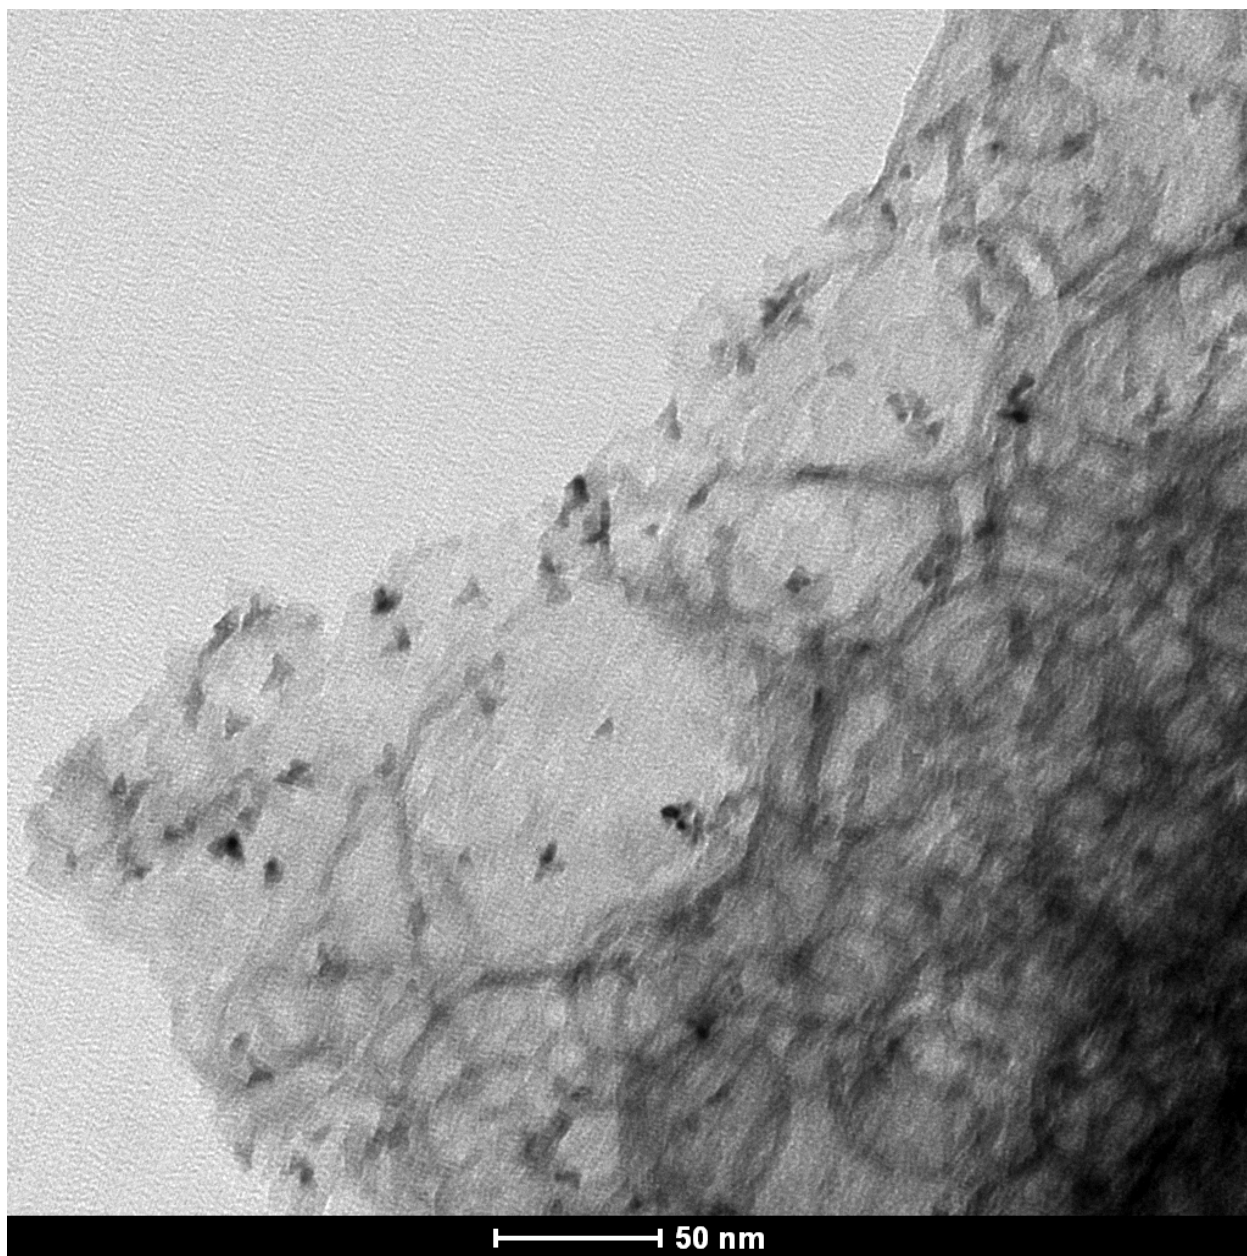

**Figure S12.** TEM image of post-catalytic Rh multipods synthesized under CvH using two phase flow reaction at 120 °C for 9 minutes after being supported on amorphous silica; scale bar is 50 nm.

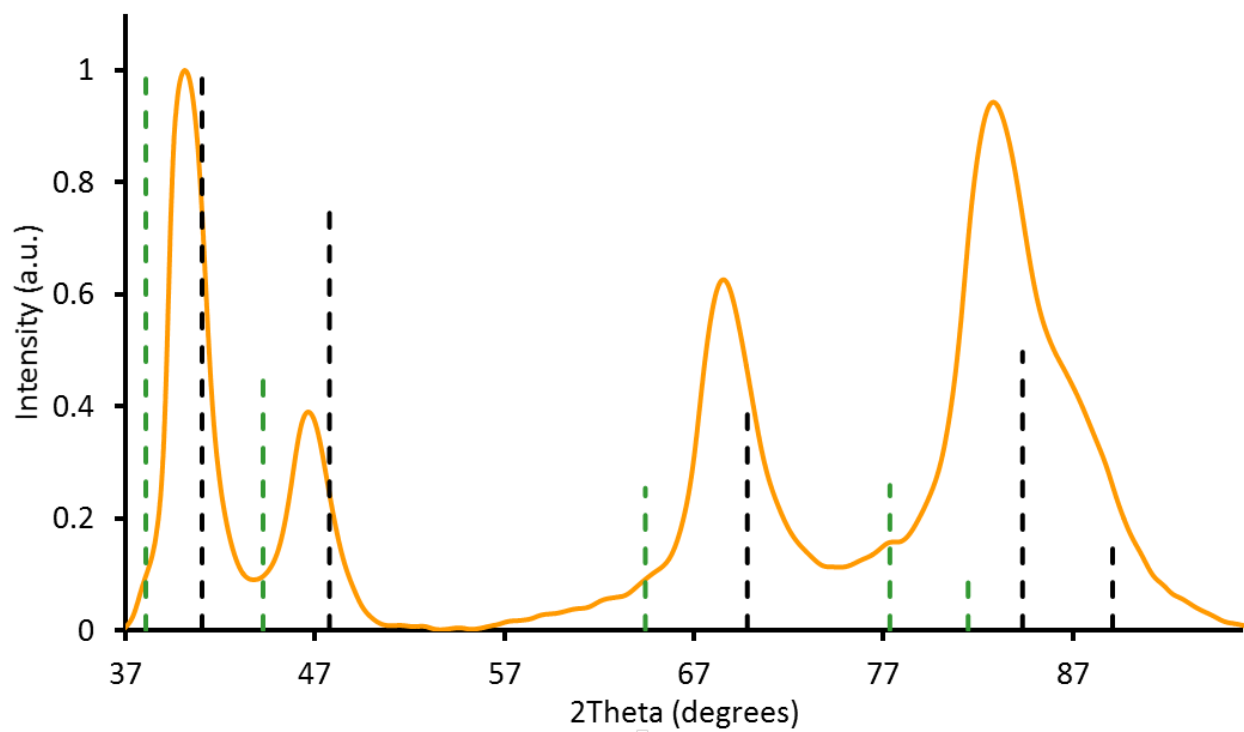

**Figure S13.** PXRD of Rh<sub>70</sub>Ag<sub>30</sub> alloy NPs using two phase flow reaction.

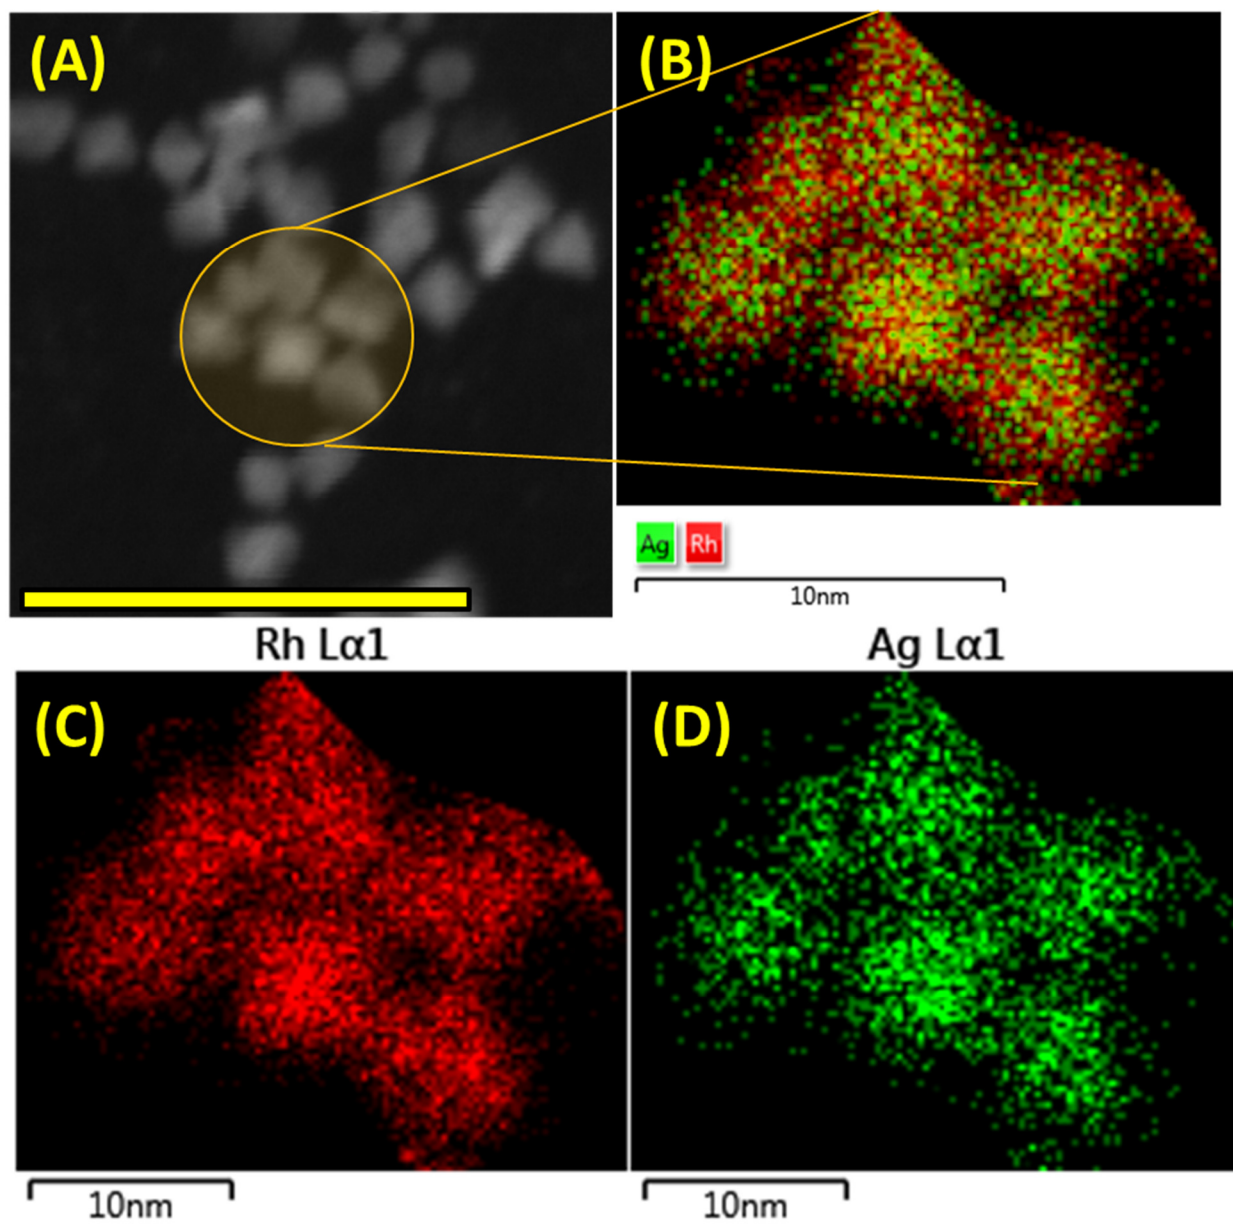

**Figure S14.** (A) HAADF-STEM images of Rh<sub>70</sub>Ag<sub>30</sub> alloy NPs synthesized using two phase flow reaction; (B)-(D) show 2D EDS mapping results. Scale bar is 50 nm.



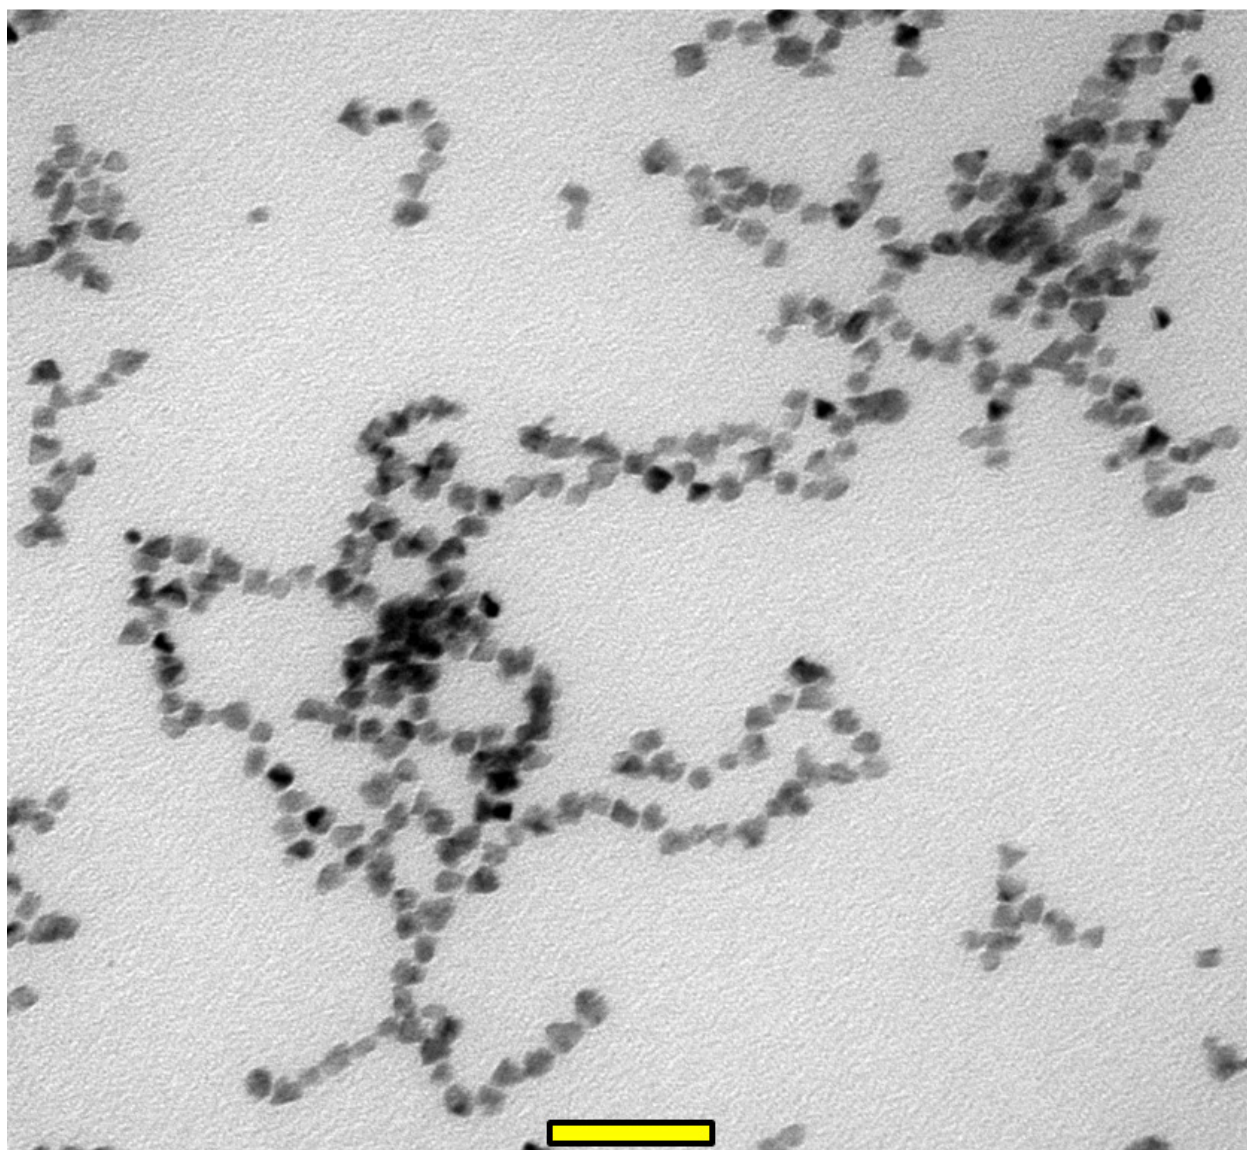

**Figure S15.** TEM images of Rh<sub>70</sub>Ag<sub>30</sub> alloy NPs using two phase flow reaction; scale bar is 50 nm.

**Equation S1.** Activity was calculated using the following formula:

$$\begin{aligned} & \text{Activity } (\mu\text{mol g}^{-1} \text{s}^{-1}) \\ = & \left( \frac{1}{\text{Mass of catalyst used (g)}} * \frac{\text{C6H10 flow } \left( \frac{\text{mol}}{\text{min}} \right) * 10^6}{60 \left( \frac{\text{s}}{\text{min}} \right)} \right) \\ & \left( \frac{(\text{Area counts for cyclohexane})}{(\text{MW of cyclohexane})} \right) \\ * & \frac{1}{\left( \frac{(\text{Area counts for cyclohexane})}{(\text{MW of cyclohexane})} \right) + \left( \frac{(\text{Area counts for cyclohexene})}{(\text{MW of cyclohexene})} \right)} \end{aligned}$$

Turnover frequency normalized for Rh loading was calculated using the formula:

$$\text{TOF (S}^{-1}\text{)} = \frac{\text{Activity} * 10^{-6} (\text{mol}/(\mu\text{mol}))}{\frac{(\text{Wt\% of Rh})}{(\text{MW of Rh})}} * \frac{1}{\left[ \text{percentage of } \left( \frac{(\text{Surface area})}{(\text{Volume})} \right) \text{ for the NPs} \right]}$$

### Kinetic studies and determination of activation energies.

The catalytic run was started at 25 °C and temperature was changed to 30 °C after attainment of steady state conversion of cyclohexene to cyclohexane at 25 °C. Temperature was held constant at 30 °C until the steady state was achieved again. This process was repeated for temperature values of 24, 18, 12, and 6 °C respectively. The activation energy values were obtained using the slope of the best fit line by plotting Ln (activity) vs.  $\frac{1}{T(K)}$ . The activity values were averaged using at least four points corresponding to steady state of the catalysts.
